# Supplementary material for: Paper-based fluoroimmunoassay for rapid and sensitive detection of antigen
Source: Royal Society of Chemistry journal article supplement (doi:10.1039/c2ra20156a), 2012-01-01
Supplement: c2ra20156a.pdf [file c2ra20156a.pdf]

## *Electronic Supplementary Information*

Paper-Based Fluoroimmunoassay for Rapid and Sensitive

Detection of Antigen

*Jing Liang, Yanyan Wang and Bin Liu\**

Department of Chemical and Biomolecular Engineering, 4 Engineering Drive 4,

National University of Singapore, 117576, Singapore

\* Corresponding author. Tel.: +65 65168049; fax: +65 67791936.

E-mail address: cheliub@nus.edu.sg.

**Gold Aggregation Test for Determination of Minimum Anti-goat IgG Concentration.** Briefly, 10  $\mu\text{L}$  of anti-goat IgG at different concentrations were added to 14 nm Au colloidal solution (200  $\mu\text{L}$ ) adjusted to pH 9.0 to reach final concentrations from 0.48  $\mu\text{g/mL}$  to 47.50  $\mu\text{g/mL}$ . After 1 h incubation at room temperature, 30  $\mu\text{L}$  of 10% NaCl was added to each mixture. The UV-vis spectra were measured for each sample (Fig. S1).

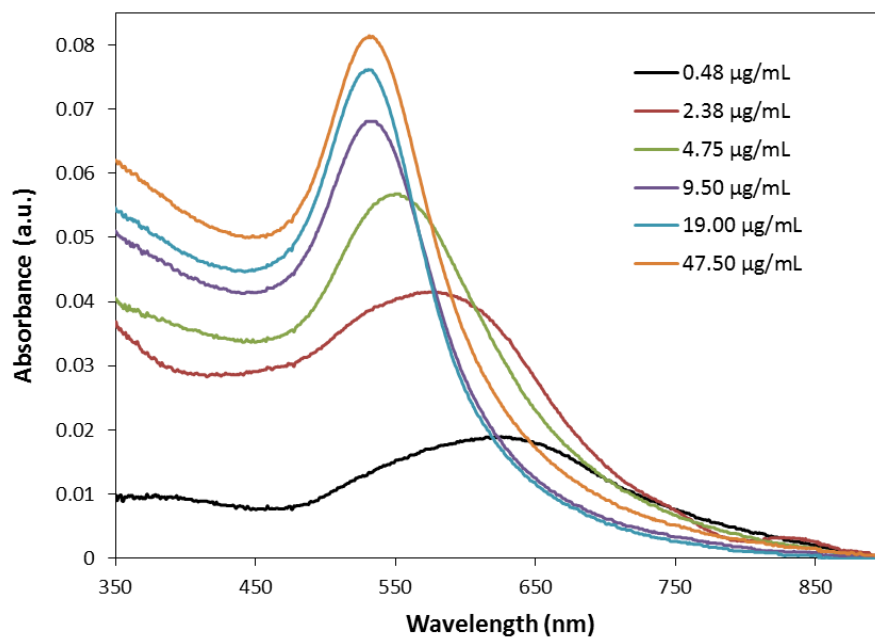

**Fig. S1.** Absorption spectra of Au NPs incubated with anti-goat IgG at different concentrations. When the concentration drops below 19 µg/mL, there is a gradual red-shift of the spectra with the decreasing protein concentration, indicating higher degree of aggregation due to insufficient protein protection.
